# Supplementary material for: A consolidated analysis of the physiologic and molecular responses induced under acid stress in the legume-symbiont model-soil bacterium Sinorhizobium meliloti
Source: PubMed Central journal article supplement (PMC4941405; doi:10.1038/srep29278), 2016-07-11
Supplement: srep29278-s2.pdf [file srep29278-s2.pdf]

**A consolidated analysis of the physiologic and molecular responses induced under acid stress in the legume-symbiont model-soil bacterium *Sinorhizobium meliloti*.**

Draghi, W. O.<sup>1</sup>; Del Papa, M. F. <sup>1</sup>; Hellweg, C.<sup>2</sup>; Watt, S. A.<sup>2</sup>; Watt, T. F.<sup>2</sup>; Barsch, A<sup>2</sup>.  
Lozano, M. J.<sup>1</sup>; Lagares, A. (Jr.)<sup>4</sup>; Salas, M. E<sup>1</sup>; López, J. L.<sup>1</sup>; Albicoro, F. J.<sup>1</sup>; Nilson, J. F.<sup>1</sup>; Torres Tejerizo, G. A.<sup>1</sup>; Luna, M. F. <sup>3</sup>; Pistorio, M.<sup>1</sup>; Boiardi, J. L.<sup>3</sup>; Pühler, A.<sup>2</sup>; Weidner; S.<sup>2</sup>; Niehaus, K.<sup>2</sup>; and Lagares A. <sup>1\*</sup>

<sup>1</sup> IBBM - Instituto de Biotecnología y Biología Molecular, CONICET - Departamento de Ciencias Biológicas, Facultad de Ciencias Exactas, Universidad Nacional de La Plata, calles 47 y 115, 1900-La Plata, Argentina

<sup>2</sup> CeBiTec - Centrum für Biotechnologie, Universität Bielefeld, Bielefeld, Germany

<sup>3</sup> CINDEFI – Centro de Investigación y Desarrollo en Fermentaciones Industriales, CONICET - Departamento de Química, Facultad de Ciencias Exactas, Universidad Nacional de La Plata, calles 47 y 115, 1900-La Plata, Argentina

<sup>4</sup> Laboratorio de Bioquímica, Microbiología e Interacciones Biológicas en el Suelo, Departamento de Ciencia y Tecnología, Universidad Nacional de Quilmes, Roque Sáenz Peña 352, Bernal B1876BXD, Buenos Aires, Argentina

**Key words:** acid stress, rhizobia, legume

**\*Corresponding author**

Phone: +54-221-425-0497 ext. 31

Fax: +54-221-422-3409 ext. 56

E-mail:lagares@biol.unlp.edu.ar

Supplementary Table 1. mRNA transcripts induced in acid chemostat cultures. Values are ordered by M-values (M>1.58).

| ORFName  | Gene         | M-Value    | P-Value    | A-Value    | COG Function                                    |
|----------|--------------|------------|------------|------------|-------------------------------------------------|
| SMa1262  | -            | 1.58548904 | 6.6536E-07 | 11.589882  | General function prediction only                |
| SMa2408  | <i>alcA</i>  | 1.59611731 | 0.00014554 | 8.34364176 | Secondary metabolites biosynthesis              |
| SMc02652 | <i>rnc</i>   | 1.60666928 | 7.881E-06  | 8.39098757 | Transcription                                   |
| SMa0815  | <i>nifA</i>  | 1.61104863 | 9.0315E-09 | 11.2389603 | Transcription Signal transduction mechanisms    |
| SMc02499 | <i>atpA</i>  | 1.61189688 | 3.5167E-07 | 12.1172341 | Energy production and conversion                |
| SMb20204 | <i>pqqA</i>  | 1.63121328 | 2.0677E-09 | 12.9390689 | Not in COGs                                     |
| SMc02940 | <i>yaeN</i>  | 1.63396401 | 2.1335E-06 | 11.0011781 | Cell cycle control                              |
| SMc01299 | <i>rplN</i>  | 1.63755784 | 3.436E-10  | 13.9868273 | Translation                                     |
| SMc02146 | <i>pstS</i>  | 1.63895592 | 1.3539E-08 | 10.3010513 | Inorganic ion transport and metabolism          |
| SMc02435 | <i>hemK</i>  | 1.64232368 | 2.3632E-07 | 11.1607666 | Translation                                     |
| SMc00714 | <i>plsC</i>  | 1.64762275 | 4.3503E-08 | 9.50681642 | Lipid transport and metabolism                  |
| SMa0851  | <i>glpD</i>  | 1.64878712 | 5.4278E-06 | 8.83733124 | Not in COGs                                     |
| SMa1207  | <i>dnr</i>   | 1.65074116 | 2.1521E-09 | 9.77307533 | Signal transduction mechanisms                  |
| SMc04094 | -            | 1.65324515 | 3.294E-11  | 10.5318432 | Function unknown                                |
| SMc01784 | <i>plsX</i>  | 1.65542888 | 2.7463E-10 | 11.1278399 | Lipid transport and metabolism                  |
| SMa0163  | <i>rhcC2</i> | 1.65807817 | 6.1101E-08 | 11.5715085 | Intracellular trafficking                       |
| SMb21189 | <i>lgtD</i>  | 1.66324295 | 8.1016E-09 | 12.2021789 | Cell Wall                                       |
| SMc03961 | <i>sqdB</i>  | 1.67367763 | 5.0054E-08 | 11.3813073 | Cell wall Carbohydrate transport and metabolism |
| SMc04277 | <i>fabZ</i>  | 1.68043692 | 2.0426E-09 | 11.1445314 | Lipid transport and metabolism                  |
| SMb20552 | <i>gbpD</i>  | 1.68976668 | 8.9158E-12 | 14.1351932 | General function prediction only                |
| SMa0633  | <i>ywaD</i>  | 1.69280641 | 3.8435E-07 | 9.63030511 | Not in COGs                                     |
| SMa0848  | -            | 1.69379288 | 1.4781E-07 | 10.8045351 | Not in COGs                                     |
| SMc02495 | <i>tal</i>   | 1.6987857  | 1.8854E-09 | 11.2053186 | Carbohydrate transport and metabolism           |
| SMc01152 | <i>rpsT</i>  | 1.70560369 | 3.5147E-06 | 11.4636977 | Translation                                     |
| SMc02408 | <i>rnpO</i>  | 1.71128929 | 3.0665E-10 | 11.5210901 | Transcription                                   |
| SMc00186 | -            | 1.71227873 | 1.5971E-09 | 10.8435777 | Defense mechanisms                              |

Supplementary Table 1. mRNA transcripts induced in acid chemostat cultures. Values are ordered by M-values ( $M > 1.58$ ) (continued).

| ORFName  | Gene        | M-Value    | P-Value    | A-Value    | COG Function                                                                                                                                  |
|----------|-------------|------------|------------|------------|-----------------------------------------------------------------------------------------------------------------------------------------------|
| SMb21295 | <i>ibpA</i> | 1.71624612 | 7.8491E-76 | 9.70269968 | Posttranslational modification                                                                                                                |
| SMc00458 | <i>phoP</i> | 1.72021917 | 1.898E-09  | 11.2598127 | Signal transduction mechanisms Transcription<br>Carbohydrate transport and metabolism Amino<br>acid transport and metabolism General function |
| SMc01844 | -           | 1.72425225 | 4.5826E-10 | 9.31321083 | prediction only                                                                                                                               |
| SMc03881 | <i>rpmF</i> | 1.72454849 | 8.0501E-09 | 10.4659343 | Translation                                                                                                                                   |
| SMc02160 | -           | 1.72769843 | 2.0224E-09 | 11.4521501 | General function prediction only                                                                                                              |
| SMc00340 | <i>kguD</i> | 1.72781013 | 1.2431E-06 | 10.149035  | Amino acid transport and metabolism                                                                                                           |
| SMb21516 | -           | 1.72970806 | 9.1608E-05 | 9.98017181 | Function unknown                                                                                                                              |
| SMc02847 | <i>pan</i>  | 1.7341864  | 1.2939E-07 | 10.4061813 | General function prediction only                                                                                                              |
| SMA1179  | <i>nosR</i> | 1.73716439 | 5.9531E-06 | 10.8097133 | Transcription                                                                                                                                 |
| SMc02242 | -           | 1.73944422 | 3.7767E-06 | 9.95087774 | Not in COGs                                                                                                                                   |
| SMc03773 | -           | 1.74083749 | 6.998E-08  | 10.1060028 | Translation                                                                                                                                   |
| SMb20364 | <i>afuB</i> | 1.74415835 | 2.3791E-07 | 10.5953971 | Inorganic ion transport and metabolism                                                                                                        |
| SMc03847 | <i>ccmA</i> | 1.75879981 | 2.7494E-08 | 10.7837017 | Posttranslational modification                                                                                                                |
| SMc01765 | -           | 1.7589209  | 1.2229E-09 | 12.3495481 | Function unknown                                                                                                                              |
| SMc00725 | <i>argH</i> | 1.76003048 | 1.3865E-07 | 9.25664494 | Amino acid transport and metabolism                                                                                                           |
| SMc00743 | -           | 1.76135526 | 6.5816E-08 | 11.6420969 | General function prediction only                                                                                                              |
| SMc00088 | -           | 1.76932097 | 3.0234E-07 | 9.77864069 | Not in COGs                                                                                                                                   |
| SMc00568 | <i>rpsF</i> | 1.77340838 | 9.7325E-09 | 15.0548857 | Translation                                                                                                                                   |
| SMA1776  | -           | 1.78208017 | 1.6694E-10 | 11.4471249 | Function unknown                                                                                                                              |
| SMA1573  | <i>ctpF</i> | 1.79083006 | 3.4408E-08 | 12.1031189 | Intracellular trafficking                                                                                                                     |
| SMc02854 | -           | 1.79785853 | 1.4632E-09 | 9.59392957 | Not in COGs                                                                                                                                   |
| SMc00153 | -           | 1.80141303 | 1.5469E-08 | 11.2929695 | Function unknown                                                                                                                              |
| SMc03877 | <i>mgsS</i> | 1.80241283 | 9.7306E-09 | 11.0999487 | Replication Transcription Translation                                                                                                         |
| SMc03795 | <i>leuD</i> | 1.81568775 | 6.338E-10  | 11.7182454 | Amino acid transport and metabolism                                                                                                           |
| SMc01458 | -           | 1.81707972 | 2.7203E-08 | 10.8066607 | Cell Wall                                                                                                                                     |
| SMc03172 | <i>gltX</i> | 1.82232227 | 5.8738E-07 | 9.41125924 | Translation                                                                                                                                   |

Supplementary Table 1. mRNA transcripts induced in acid chemostat cultures. Values are ordered by M-values (M>1.58) (continued).

| ORFName  | Gene        | M-Value    | P-Value    | A-Value    | COG Function                                                           |
|----------|-------------|------------|------------|------------|------------------------------------------------------------------------|
| SMb20989 | <i>hflC</i> | 1.8337062  | 5.3566E-11 | 14.4940582 | Posttranslational modification                                         |
| SMc00335 | <i>rpsA</i> | 1.86097983 | 8.905E-180 | 12.4298527 | Translation                                                            |
| SMb21009 | <i>glpK</i> | 1.86327712 | 2.8921E-06 | 8.1923785  | Energy production and conversion                                       |
| SMc02692 | <i>rplY</i> | 1.86869095 | 2.0148E-09 | 11.4769038 | Translation                                                            |
| SMb21175 | <i>phnE</i> | 1.87226692 | 9.7593E-06 | 9.16836781 | Inorganic ion transport and metabolism                                 |
| SMb20353 | <i>ida</i>  | 1.87869926 | 3.4759E-09 | 13.0454888 | General function prediction only                                       |
| SMc03772 | <i>rpmA</i> | 1.88630814 | 5.7149E-10 | 11.1127087 | Translation                                                            |
| SMc01513 | <i>hmuS</i> | 1.88837001 | 2.3742E-07 | 9.59808693 | Inorganic ion transport and metabolism                                 |
| SMc02278 | -           | 1.90030015 | 3.017E-08  | 10.089171  | Not in COGs                                                            |
| SMc03070 | <i>zwf</i>  | 1.90177682 | 2.6429E-08 | 12.8426324 | Carbohydrate transport and metabolism                                  |
| SMc00280 | -           | 1.9092699  | 2.3396E-09 | 12.2690889 | Not in COGs                                                            |
| SMb20920 | <i>htr8</i> | 1.91166465 | 4.153E-10  | 12.2190615 | Not in COGs                                                            |
| SMc02580 | <i>hyuA</i> | 1.9119882  | 4.8436E-11 | 12.8460196 | Amino acid transport and metabolism Secondary metabolites biosynthesis |
| SMc01914 | <i>nuoC</i> | 1.9164944  | 3.1152E-09 | 10.4118907 | Energy production and conversion                                       |
| SMc00960 | <i>tldD</i> | 1.91878312 | 1.3023E-09 | 12.09047   | General function prediction only                                       |
| SMc00485 | <i>rpsD</i> | 1.92030632 | 7.9846E-08 | 11.2509876 | Translation                                                            |
| SMb20754 | -           | 1.92099003 | 2.0953E-09 | 13.2867666 | General function prediction only                                       |
| SMc01861 | <i>murE</i> | 1.9278184  | 1.1845E-07 | 9.41720828 | Cell Wall                                                              |
| SMA1266  | <i>hemN</i> | 1.95374362 | 5.6914E-09 | 8.1951981  | Coenzyme transport and metabolism                                      |
| SMc01774 | <i>carB</i> | 1.96335101 | 2.2415E-07 | 14.9881615 | Not in COGs                                                            |
| SMc02434 | -           | 1.96482026 | 1.7012E-08 | 12.0489034 | Not in COGs                                                            |
| SMc02723 | -           | 1.96645362 | 8.2126E-07 | 8.07771216 | General function prediction only                                       |
| SMc00712 | -           | 1.9677443  | 2.9652E-07 | 10.8446119 | Function unknown                                                       |
| SMA1128  | <i>htrA</i> | 1.96867045 | 1.7848E-09 | 10.9339964 | Posttranslational modification                                         |
| SMc00324 | <i>pnp</i>  | 1.97083763 | 8.6482E-11 | 11.9721467 | Translation                                                            |
| SMc02432 | -           | 1.97642878 | 1.6702E-10 | 9.4728603  | Cell Wall                                                              |
| SMc02365 | <i>dop</i>  | 1.97802733 | 1.7601E-08 | 12.920852  | Posttranslational modification                                         |

Supplementary Table 1. mRNA transcripts induced in acid chemostat cultures. Values are ordered by M-values ( $M > 1.58$ ) (continued).

| ORFName  | Gene             | M-Value    | P-Value    | A-Value    | COG Function                                                          |
|----------|------------------|------------|------------|------------|-----------------------------------------------------------------------|
| SMb21505 | <i>exoQ</i>      | 1.9794309  | 1.1248E-12 | 12.5826702 | Cell Wall                                                             |
| SMc01026 | <i>recJ-like</i> | 2.00162427 | 4.463E-06  | 11.7774381 | Not in COGs                                                           |
| SMc04267 | <i>nodH</i>      | 2.0051896  | 3.3065E-06 | 8.7728241  | Function unknown                                                      |
| SMc00522 | <i>rhlE</i>      | 2.00550708 | 1.9818E-11 | 12.4130613 | Replication Transcription Translation                                 |
| SMc00092 | <i>cysH</i>      | 2.01838442 | 5.6151E-07 | 10.0786159 | Amino acid transport and metabolism Coenzyme transport and metabolism |
| SMa0760  | <i>fixT1</i>     | 2.01966309 | 4.091E-09  | 9.98705815 | Signal transduction mechanisms                                        |
| SMa1296  | <i>adhP</i>      | 2.03681958 | 2.5231E-09 | 9.85717951 | General function prediction only                                      |
| SMb21518 | <i>amiC</i>      | 2.05968016 | 7.248E-08  | 9.76162349 | Not in COGs                                                           |
| SMa1170  | <i>coxM</i>      | 2.06474012 | 1.61E-09   | 10.1719019 | Energy production and conversion                                      |
| SMc00815 | <i>guaB</i>      | 2.08083691 | 1.051E-10  | 9.5094357  | Nucleotide transport and metabolism                                   |
| SMc02349 | <i>frdA</i>      | 2.10336064 | 1.892E-08  | 9.29736269 | Energy production and conversion                                      |
| SMc02052 | -                | 2.10659565 | 4.7741E-10 | 13.7267537 | Not in COGs                                                           |
| SMc00349 | <i>lepA</i>      | 2.11038278 | 2.3696E-11 | 10.7332912 | Cell Wall                                                             |
| SMc00062 | -                | 2.12651004 | 2.759E-10  | 10.0586615 | Function unknown                                                      |
| SMc00929 | <i>gcvA</i>      | 2.13165304 | 1.2383E-07 | 10.696463  | Transcription                                                         |
| SMa0849  | <i>syrM</i>      | 2.14579821 | 1.4983E-08 | 8.59723487 | Transcription                                                         |
| SMc01913 | <i>nuoB</i>      | 2.16256873 | 1.2241E-10 | 12.8162302 | Energy production and conversion                                      |
| SMa1220  | <i>fixN</i>      | 2.17602433 | 2.6643E-13 | 10.2595307 | Energy production and conversion                                      |
| SMa1082  | -                | 2.17879589 | 7.101E-11  | 13.8071505 | Not in COGs                                                           |
| SMc00483 | <i>murI</i>      | 2.1831555  | 1.8449E-09 | 9.09631641 | Cell Wall                                                             |
| SMc01910 | <i>yhaN</i>      | 2.18401738 | 5.8631E-10 | 10.9711717 | Function unknown                                                      |
| SMc00363 | <i>rpmI</i>      | 2.1851894  | 2.149E-176 | 11.7115846 | Translation                                                           |
| SMc03831 | -                | 2.18809666 | 4.3008E-08 | 8.3598153  | General function prediction only                                      |
| SMc01314 | <i>rpsL</i>      | 2.20656093 | 1.191E-06  | 12.2038182 | Translation                                                           |
| SMc01580 | <i>ydaH</i>      | 2.23360987 | 1.8605E-09 | 11.4905337 | Not in COGs                                                           |
| SMb20186 | -                | 2.23478655 | 2.8475E-08 | 9.31085783 | Function unknown                                                      |

Supplementary Table 1. mRNA transcripts induced in acid chemostat cultures. Values are ordered by M-values ( $M > 1.58$ ) (continued).

| ORFName  | Gene         | M-Value    | P-Value    | A-Value    | COG Function                           |
|----------|--------------|------------|------------|------------|----------------------------------------|
| SMa2073  | <i>acd</i>   | 2.2381681  | 1.6872E-06 | 8.27207909 | Lipid transport and metabolism         |
| SMa1211  | <i>fixG</i>  | 2.24663493 | 1.3055E-11 | 11.194584  | Energy production and conversion       |
| SMc04411 | -            | 2.25117563 | 3.7428E-08 | 10.9314709 | Cell Wall                              |
| SMc00007 | <i>aroC</i>  | 2.26571808 | 1.6922E-09 | 9.10586702 | Amino acid transport and metabolism    |
| SMa1243  | <i>azuI</i>  | 2.33823412 | 6.1603E-13 | 13.6674307 | Energy production and conversion       |
| SMc00331 | -            | 2.37393529 | 6.1404E-09 | 8.17181182 | Function unknown                       |
| SMc00690 | <i>accA</i>  | 2.38198883 | 3.3534E-11 | 10.851773  | Lipid transport and metabolism         |
| SMc00332 | -            | 2.39183692 | 1.2072E-09 | 10.4192665 | Function unknown                       |
| SMc02305 | <i>murA</i>  | 2.40381945 | 2.3944E-10 | 10.7902713 | Cell Wall                              |
| SMa1077  | <i>nex18</i> | 2.42590077 | 2.5445E-15 | 12.5162321 | Cell Wall                              |
| SMb21440 | -            | 2.44227378 | 3.7807E-10 | 12.7405598 | Not in COGs                            |
| SMc01718 | -            | 2.44515381 | 4.31E-10   | 11.2952843 | Function unknown                       |
| SMb20880 | <i>rhlE</i>  | 2.47527439 | 1.1079E-11 | 12.902477  | Replication Transcription Translation  |
| SMc01341 | -            | 2.47652358 | 6.1068E-12 | 10.1460719 | Not in COGs                            |
| SMc01912 | <i>nuoA</i>  | 2.51419105 | 1.3449E-08 | 12.082341  | Energy production and conversion       |
| SMc02266 | -            | 2.56144284 | 1.3452E-10 | 10.924509  | Not in COGs                            |
| SMa2075  | -            | 2.57806859 | 0.00265956 | 9.93639692 | Amino acid transport and metabolism    |
| SMc00364 | <i>rplT</i>  | 2.58074563 | 9.0335E-11 | 10.9507509 | Translation                            |
| SMa0763  | -            | 2.63124341 | 1.3827E-11 | 10.8928482 | General function prediction only       |
| SMc02897 | <i>cycM</i>  | 2.64861469 | 3.8028E-07 | 10.158078  | Energy production and conversion       |
| SMc01313 | <i>rpsG</i>  | 2.71057062 | 1.5495E-12 | 11.3717463 | Translation                            |
| SMc00567 | <i>rpsR</i>  | 2.74219768 | 1.0247E-08 | 10.5131972 | Translation                            |
| SMc00950 | -            | 2.98966637 | 3.3295E-13 | 11.1952996 | General function prediction only       |
| SMc03239 | <i>ppa</i>   | 3.00297141 | 2.1002E-12 | 11.5187615 | Energy production and conversion       |
| SMa0045  | <i>cah</i>   | 3.22485924 | 1.6534E-11 | 9.45772375 | Inorganic ion transport and metabolism |
| SMc03242 | <i>typA</i>  | 3.3801664  | 3.3699E-11 | 9.33349902 | Signal transduction mechanisms         |
| SMc01855 | <i>slt</i>   | 3.57531647 | 3.3829E-10 | 10.7774849 | Cell wall                              |
| SMc02900 | -            | 3.79119397 | 3.4822E-09 | 11.9605937 | Not in COGs                            |

Supplementary Table 1. . mRNA transcripts repressed in acid chemostat cultures. Values are ordered by M-values (M< -1.58) (continued).

| ORFName  | Gene          | M-Value     | P-Value    | A-Value    | COG Function                                                       |
|----------|---------------|-------------|------------|------------|--------------------------------------------------------------------|
| SMb20605 | -             | -4.8237228  | 2.8144E-11 | 12.842455  | Amino acid transport and metabolism                                |
| SMb20984 | <i>nirB</i>   | -4.60196563 | 1.0679E-07 | 10.0935251 | Energy production and conversion                                   |
| SMA1683  | <i>aslA1</i>  | -4.58393294 | 3.1606E-11 | 11.574338  | Inorganic ion transport and metabolism                             |
| SMc03806 | <i>glnK</i>   | -4.5559039  | 1.4036E-10 | 13.0318113 | Amino acid transport and metabolism                                |
| SMA0585  | <i>nrtA</i>   | -4.24410458 | 4.7281E-09 | 13.1821797 | Inorganic ion transport and metabolism                             |
| SMb20886 | -             | -4.20488909 | 0.00046482 | 10.1170777 | Function unknown                                                   |
| SMb20436 | <i>narK</i>   | -4.19954839 | 2.533E-09  | 10.2347374 | Inorganic ion transport and metabolism                             |
| SMb20604 | -             | -3.99228824 | 5.6104E-09 | 9.62795438 | Amino acid transport and metabolism                                |
| SMc03807 | <i>amtB</i>   | -3.94014173 | 1.9428E-09 | 11.4229338 | Inorganic ion transport and metabolism                             |
| SMc03049 | <i>flgL</i>   | -3.91922003 | 7.4077E-08 | 9.37431295 | Cell motility                                                      |
| SMc03037 | <i>flaD</i>   | -3.2183134  | 1.0523E-08 | 12.0556974 | Cell motility                                                      |
| SMc03030 | <i>flgG</i>   | -3.17920173 | 2.3094E-05 | 8.90353865 | Cell motility                                                      |
| SMA2361  | -             | -3.04849128 | 1.5749E-07 | 9.35299126 | General function prediction only                                   |
| SMc00979 | -             | -2.86230151 | 1.8468E-08 | 9.36507761 | Not in COGs                                                        |
| SMc02240 | -             | -2.85637038 | 7.7598E-12 | 11.9075516 | Function unknown                                                   |
| SMc02118 | <i>aapJ</i>   | -2.81539955 | 3.3282E-12 | 13.4518406 | Amino acid transport and metabolism Signal transduction mechanisms |
| SMA1635  | <i>cgmA</i>   | -2.79636394 | 5.4478E-13 | 12.7300604 | Not in COGs                                                        |
| SMA0392  | <i>potD_2</i> | -2.75958006 | 1.2701E-08 | 11.0969597 | Amino acid transport and metabolism                                |
| SMb20745 | <i>glnII</i>  | -2.71897977 | 3.3381E-11 | 13.0684081 | Amino acid transport and metabolism                                |
| SMc03038 | <i>flaD</i>   | -2.67047572 | 2.7626E-07 | 11.6799569 | Cell motility                                                      |
| SMc03027 | <i>flgB</i>   | -2.63290948 | 4.7024E-09 | 9.01862498 | Cell motility                                                      |
| SMc02119 | <i>aapQ</i>   | -2.60828229 | 3.5717E-12 | 12.4646164 | Amino acid transport and metabolism                                |
| SMc04114 | <i>ctpA</i>   | -2.605422   | 2.8414E-07 | 13.5354024 | Intracellular trafficking                                          |
| SMA0612  | <i>fixN</i>   | -2.59772954 | 0.00028612 | 10.2399307 | Energy production and conversion                                   |
| SMc01946 | <i>livK</i>   | -2.58926532 | 2.3189E-09 | 14.1116802 | Amino acid transport and metabolism                                |
| SMc01827 | -             | -2.58805018 | 1.2323E-09 | 11.5358971 | Inorganic ion transport and metabolism                             |
| SMc03834 | <i>phhB</i>   | -2.58255582 | 8.8064E-08 | 10.1806492 | Coenzyme transport and metabolism                                  |

Supplementary Table 1. . mRNA transcripts repressed in acid chemostat cultures. Values are ordered by M-values (M< -1.58) (continued).

| ORFName  | Gene        | M-Value     | P-Value    | A-Value    | COG Function                                                            |
|----------|-------------|-------------|------------|------------|-------------------------------------------------------------------------|
| SMb20915 | <i>atsA</i> | -2.45630288 | 4.2672E-09 | 10.8073034 | Inorganic ion transport and metabolism                                  |
| SMA0583  | <i>nrtB</i> | -2.41411749 | 1.9613E-06 | 9.74479903 | Inorganic ion transport and metabolism                                  |
| SMb20985 | <i>nirD</i> | -2.36799963 | 2.5737E-05 | 9.41529441 | Inorganic ion transport and metabolism General function prediction only |
| SMc03029 | <i>fliE</i> | -2.34080057 | 9.2718E-08 | 9.70935776 | Cell motility Intracellular trafficking                                 |
| SMc04043 | -           | -2.31265869 | 6.15E-09   | 10.6379739 | Amino acid transport and metabolism                                     |
| SMc02120 | <i>aapM</i> | -2.28895803 | 5.1589E-10 | 11.103403  | Amino acid transport and metabolism                                     |
| SMb21115 | <i>nasT</i> | -2.2121726  | 5.0404E-06 | 10.34089   | Signal transduction mechanisms                                          |
| SMc01930 | <i>gloA</i> | -2.15397819 | 2.4275E-07 | 11.6599722 | Amino acid transport and metabolism                                     |
| SMb20806 | -           | -2.13318033 | 9.2651E-09 | 11.753991  | Not in COGs                                                             |
| SMb20651 | <i>acpA</i> | -2.10742731 | 2.9264E-08 | 9.10940818 | Lipid transport and metabolism Secondary metabolites biosynthesis       |
| SMc03880 | -           | -2.07669752 | 3.2174E-09 | 11.6234648 | Function unknown                                                        |
| SMA1233  | <i>napB</i> | -2.05371381 | 2.1471E-06 | 9.54292997 | Energy production and conversion                                        |
| SMA1706  | -           | -2.04580646 | 2.874E-06  | 9.36455873 | Not in COGs                                                             |
| SMA0941  | <i>nodW</i> | -2.02461237 | 0.00013025 | 8.26770281 | Signal transduction mechanisms                                          |
| SMA1961  | -           | -2.0174378  | 2.1461E-07 | 11.2995703 | Secondary metabolites biosynthesis                                      |
| SMc03039 | <i>flaD</i> | -1.99479981 | 5.8005E-07 | 9.67272913 | Cell motility                                                           |
| SMb20811 | <i>csH</i>  | -1.9712435  | 6.7253E-07 | 11.2599296 | Not in COGs                                                             |
| SMA2245  | -           | -1.97033852 | 1.434E-07  | 9.78404671 | General function prediction only                                        |
| SMc00360 | -           | -1.96454914 | 1.588E-09  | 11.6491685 | Function unknown                                                        |
| SMc01947 | <i>cadB</i> | -1.95966645 | 2.2094E-08 | 11.9139712 | Not in COGs                                                             |
| SMA0937  | -           | -1.93323631 | 1.4168E-05 | 10.3920301 | Cell wall                                                               |
| SMA1857  | <i>hadL</i> | -1.9283666  | 0.00525663 | 8.56611387 | General function prediction only                                        |
| SMb21315 | <i>prsE</i> | -1.92468524 | 1.1009E-06 | 9.59601543 | Cell wall                                                               |
| SMA0943  | <i>atsA</i> | -1.89514853 | 3.3537E-06 | 10.867285  | Inorganic ion transport and metabolism                                  |
| SMc03009 | <i>cheR</i> | -1.8555164  | 4.0665E-08 | 8.42072154 | Cell motility Signal transduction mechanisms                            |
| SMb20909 | -           | -1.83954682 | 1.0283E-06 | 8.24024037 | Not in COGs                                                             |
| SMc03044 | <i>motD</i> | -1.83586073 | 6.4398E-07 | 8.36513411 | Not in COGs                                                             |



Supplementary Table 1. . mRNA transcripts repressed in acid chemostat cultures. Values are ordered by M-values (M< -1.58) (continued).

| ORFName  | Gene         | M-Value     | P-Value    | A-Value    | COG Function                                                      |
|----------|--------------|-------------|------------|------------|-------------------------------------------------------------------|
| SMb20652 | <i>ansB</i>  | -1.80067998 | 3.4077E-08 | 11.4703576 | Amino acid transport and metabolism                               |
| SMc02111 | -            | -1.78727719 | 2.6202E-09 | 13.8189215 | Not in COGs                                                       |
| SMc00283 | <i>mexT</i>  | -1.76438867 | 7.9696E-05 | 8.52914592 | Transcription                                                     |
| SMA1507  | -            | -1.75619242 | 1.1271E-07 | 9.67937287 | General function prediction only                                  |
| SMb21254 | -            | -1.74864717 | 5.7334E-09 | 11.2005776 | General function prediction only                                  |
| SMc00997 | <i>etfA</i>  | -1.72953706 | 3.5548E-06 | 9.876769   | Not in COGs                                                       |
| SMb21572 | -            | -1.7162345  | 1.5515E-07 | 11.4600786 | Amino acid transport and metabolism                               |
| SMA0391  | -            | -1.70425054 | 2.1856E-07 | 9.05746455 | Amino acid transport and metabolism                               |
| SMc00770 | <i>potF</i>  | -1.70315162 | 6.674E-08  | 12.0791701 | Amino acid transport and metabolism                               |
| SMc02079 | <i>fadL</i>  | -1.68221923 | 2.4521E-07 | 10.8569764 | Lipid transport and metabolism                                    |
| SMc00737 | -            | -1.67848298 | 6.6394E-08 | 11.1413804 | Defense mechanisms                                                |
| SMc01951 | <i>livH</i>  | -1.67481286 | 1.3215E-07 | 10.4286473 | Amino acid transport and metabolism                               |
| SMc00999 | <i>kdsB</i>  | -1.67157414 | 1.0418E-05 | 9.62400882 | Not in COGs                                                       |
| SMb21117 | <i>phrR</i>  | -1.6188859  | 1.2264E-06 | 11.0244833 | Transcription                                                     |
| SMc01967 | <i>speB2</i> | -1.61021818 | 6.9183E-09 | 9.02266091 | Amino acid transport and metabolism                               |
| SMc04018 | <i>yfkN</i>  | -1.59481426 | 7.8728E-10 | 11.4769443 | Nucleotide transport and metabolism                               |
| SMc03046 | -            | -1.59367719 | 1.2038E-06 | 10.4382086 | Signal transduction mechanisms Transcription                      |
| SMb20650 | <i>fadD</i>  | -1.58780509 | 1.0688E-09 | 11.4749924 | Lipid transport and metabolism Secondary metabolites biosynthesis |
| SMb21314 | <i>rzcA</i>  | -1.58727006 | 1.323E-07  | 11.4624031 | Secondary metabolites biosynthesis                                |
| SMc03021 | <i>fliM</i>  | -1.58141084 | 3.3752E-07 | 8.56630938 | Cell motility                                                     |
| SMc02121 | <i>aapP</i>  | -1.58021391 | 1.5804E-06 | 10.5553539 | Amino acid transport and metabolism                               |

**Supplementary Table 2.** List of metabolites detected by GC-MS and analysed by MetabolAnalyst.

|                              |                     |                    |                     |                       |                         |
|------------------------------|---------------------|--------------------|---------------------|-----------------------|-------------------------|
| 2-Amino adipate              | 2-Hydroxyglutarate  | 2-Isopropylmalate  | 4-Aminobutyrate     | 5-Methylthioadenosine | Adenine                 |
| Adenosine                    | a-Ketoaminobutyrate | a-Ketoglutarate    | Alanine             | Arabinose             | Arginin-NH <sub>3</sub> |
| b-Alanine                    | Citrate             | Cytosine           | D/L-Diaminopimelate | DHAP                  | Erythrose4P             |
| Fructose_6_P                 | Fructose            | Fumarate           | Galactose           | Gluconate             | Gluconate-1,5-lactone   |
| Gluconate-6-P                | Gluconic            | Acid               | Glucose-6-P         | Glutamine             | Glycerate               |
| Glycerol-3-P                 | Glycine             | Isocitrate         | Isoleucine          | L-Cystathionine       | L-Cysteine              |
| Leucine                      | L-Homoserine        | Malate             | Mannitol            | Mannose-6P            | Melibiose               |
| Methionine                   | myo-Inositol        | N-Acetyl-Glutamate | Norleucine          | O-Acetyl_L_Homoserine | O-Acetyl-L-Serine       |
| Ornithin_Arginine_Citrulline | Pep                 | Phenylalanine      | Proline             | Putrescine            | Pyruvate                |
| Ribose-5P                    | Ribulose-5P         | Spermidine         | Succinate           | Sucrose               | Threonine               |
| Thymine                      | Trehalose           | Tryptophane        | Tyrosine            | Uracile               | Urea                    |
| Valine.                      |                     |                    |                     |                       |                         |

**Supplementary Table 3.** Metabolites with fold change (FC) either  $\geq 2$  (increased at pH 6.1) or  $\leq 0.5$  (increased at pH 7.0) ( $p \leq 0.05$ ) (see legend to the Volcano Plot in manuscript Fig. 3).

| <b>Compound</b>               | <b>FC</b> | <b>log<sub>2</sub>(FC)</b> | <b>p-value</b> | <b>log<sub>10</sub>(p)</b> |
|-------------------------------|-----------|----------------------------|----------------|----------------------------|
| Spermidine                    | 30.74     | 4.94                       | 7.73E-07       | 6.11                       |
| beta-Alanine                  | 5.57      | 2.48                       | 8.38E-08       | 7.08                       |
| Ornithine_Arginine_Citrulline | 3.94      | 1.98                       | 1.92E-07       | 6.71                       |
| 2-Aminoadipate                | 3.80      | 1.92                       | 3.14E-06       | 5.50                       |
| Gluconate-1,5-lactone         | 3.56      | 1.83                       | 8.94E-08       | 7.05                       |
| Glucose-6-P                   | 2.42      | 1.28                       | 8.74E-06       | 5.06                       |
| Fructose                      | 2.42      | 1.27                       | 3.19E-04       | 3.50                       |
| Norleucine                    | 2.41      | 1.27                       | 1.86E-06       | 5.73                       |
| O-Acetyl_L_Homoserine         | 2.39      | 1.25                       | 6.37E-04       | 3.20                       |
| 4-Aminobutyrate               | 2.37      | 1.24                       | 2.73E-06       | 5.56                       |
| Pep                           | 2.36      | 1.24                       | 7.45E-03       | 2.13                       |
| N-Acetyl-Glutamate            | 2.31      | 1.21                       | 2.79E-03       | 2.55                       |
| Galactose                     | 2.29      | 1.19                       | 4.77E-07       | 6.32                       |
| O-Acetyl-L-Serine             | 0.49      | -1.01                      | 4.10E-05       | 4.39                       |
| Phenylalanine                 | 0.45      | -1.15                      | 2.58E-05       | 4.59                       |
| L-Cysteine                    | 0.38      | -1.38                      | 6.65E-04       | 3.18                       |
| Melibiose                     | 0.28      | -1.85                      | 7.75E-02       | 1.11                       |
| 2-Isopropylmalate             | 0.08      | -3.61                      | 5.01E-09       | 8.30                       |
| 2-Hydroxyglutarate            | 0.04      | -4.48                      | 1.62E-07       | 6.79                       |
